# Supplementary material for: Crim1 regulates integrin signaling in murine lens development
Source: Oxford University Press journal article supplement (doi:10.1242/dev.125591), 2015-01-01
Supplement: dev125591supp.pdf [file dev125591supp.pdf]

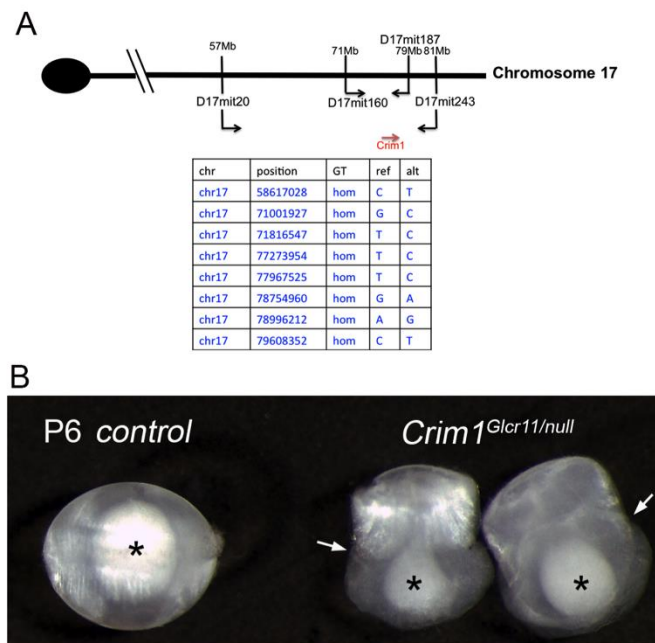

**Fig. S1. Genetic mapping of *Crim1*<sup>glcr11</sup> mutant.**

(A) Genetic map of the *glcr11* interval on mouse chromosome 17. Polymorphic markers are shown. 8 homozygous mutations within the 26 Mb region are listed in the lower panel. (B) P6 compound heterozygous *Crim1*<sup>Glc11/null</sup> mice exhibit posterior lens rupture (arrows) and other lens phenotypes observed in the individual homozygous lines, establishing allelism via non-complementation. (\*) shows cataract fixation artifact.

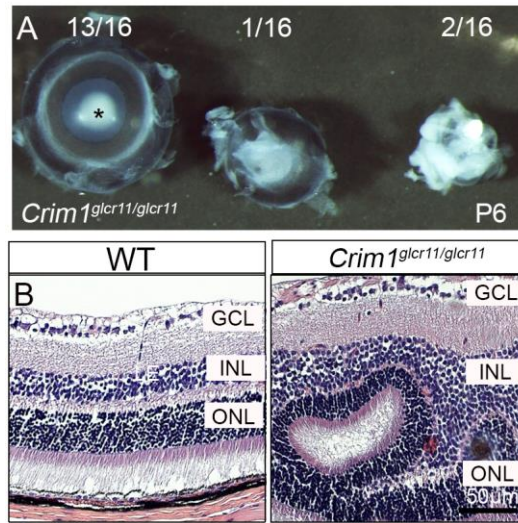

**Fig. S2. *Crim1*<sup>gcr11</sup> mutant mice develop microphthalmia and retina rosette.**

(A) P6 *Crim1*<sup>gcr11</sup> mutant mice develop variable lens phenotypes with 3/16 (~19%) developing overt microphthalmia. (\*) shows cataract fixation artifact. (B) At 2 month, *Crim1*<sup>gcr11</sup> mutant mice develop retina dysplasia with rosettes formation in the retinal tissue.

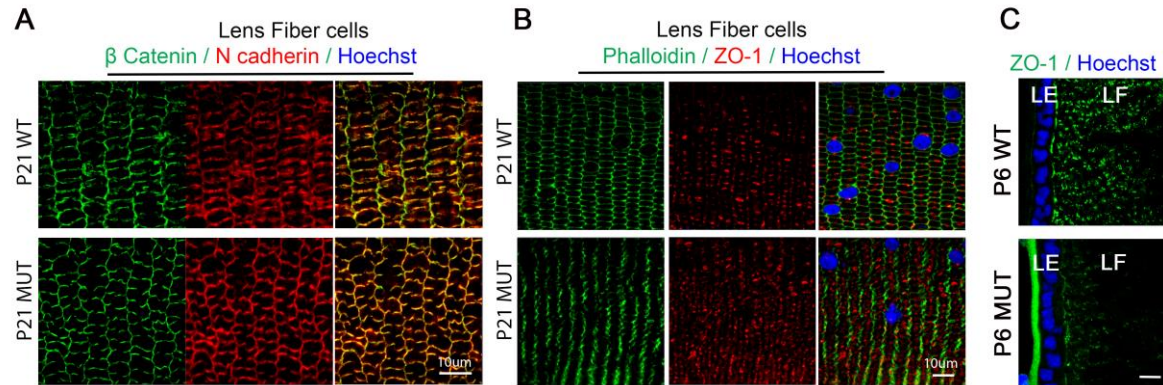

**Fig. S3. *Crim1<sup>glcr11</sup>* mutants display defects in lens cell adhesion and cell polarity. (A-B)**

Altered expression patterns of adhesion proteins ( $\beta$  catenin and N-cadherin) (A) and the polarity protein ZO-1 in P21 *Crim1<sup>glcr11</sup>* mutant central fiber cells (B). (C) Decreased ZO-1 expression is observed in regions where epithelium has close contact with fiber cell.

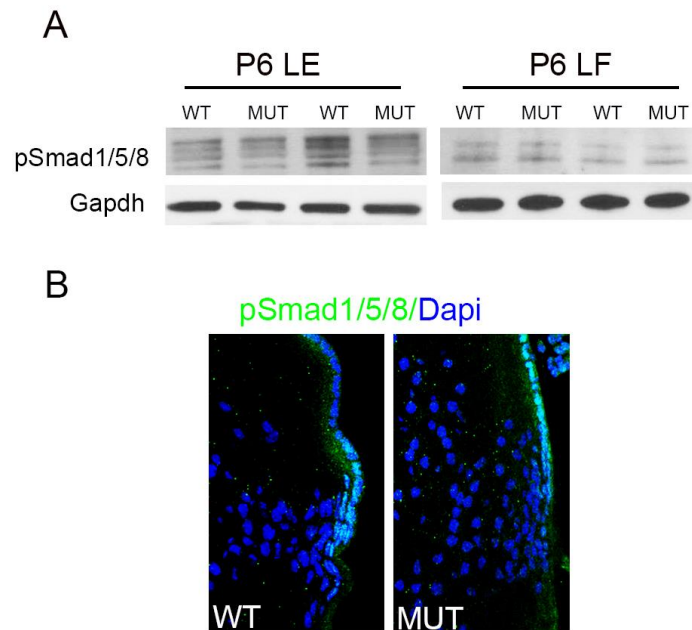

**Fig. S4. phospho-Smad 1/5/8 levels are unchanged in *Crim1<sup>g<sup>lcr11</sup></sup>* mutants.**

(A) Western blot analyses of phosphor-Smad1/5/8 in P6 wild type and mutant LE cells and fiber cells. (B) Immunostaining of phosphor-Smad1/5/8 showed no difference in *Crim1<sup>g<sup>lcr11</sup></sup>* mutants, compared to wild type.

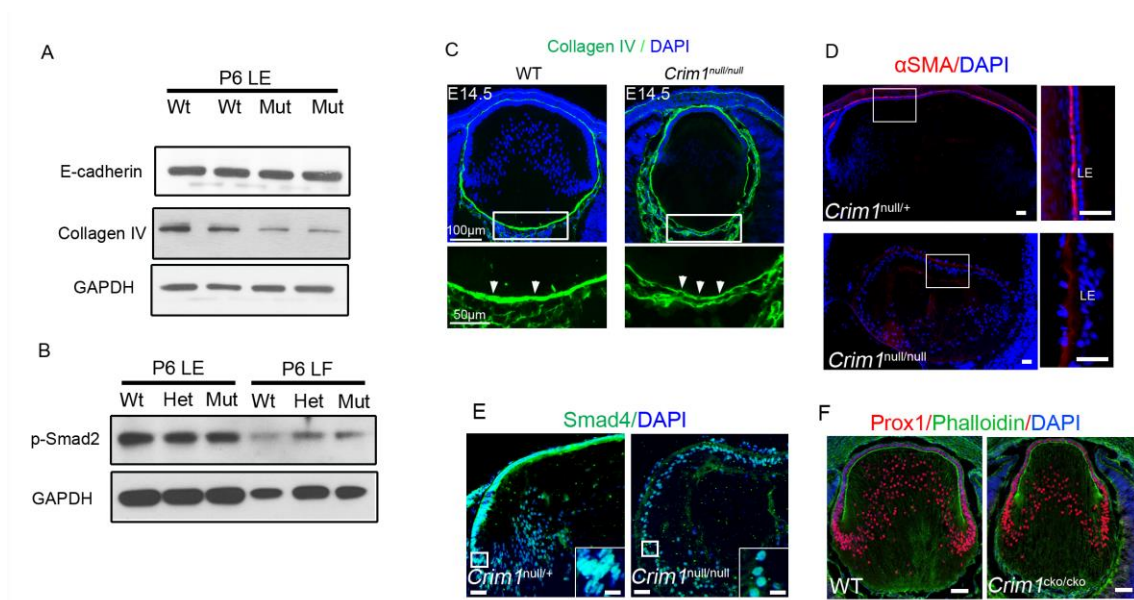

**Fig. S5. *Crim1*-deficient lens epithelium is disorganized in a way that does not involve pathologic EMT.**

(A) Western blot analyses of P6 wild type and *Crim1*<sup>glcr11</sup> mutant LE cells with the indicated antibodies. (B) Western blot analyses of phospho-Smad2 in P6 wild type and *Crim1*<sup>glcr11</sup> mutant LE cells and fiber cells. (C) Immunostaining for Collagen IV shows diffuse decreased expression in the posterior capsule of *Crim1*<sup>null</sup> mutant lens compared to wild type control lens. (D-E) Immunostaining of E18.5 lenses for alpha-smooth muscle actin (D) and Smad4 (E) shows no difference between control and *Crim1*<sup>null</sup> mutant. Inserts show higher magnification of nuclear localization of Smad4. (F) Immunostaining of E14.5 lenses for Prox1 and Phalloidin shows no difference between control and *Crim1*<sup>cko</sup> mutant.
